# Supplementary material for: Enhanced crystallization by the virtue of the complete confinement of a ultrathin poly(3-hexylthiophene) film during the patterning process
Source: Royal Society of Chemistry journal article supplement (doi:10.1039/d1nj01017d), 2021-01-01
Supplement: d1nj01017d1.pdf [file d1nj01017d1.pdf]

**Electronic Supplementary Information (ESI) for New Journal of  
Chemistry**

**The enhanced crystallization in virtue of complete confinement during the pattern process  
of poly(3-hexylthiophene) ultrathin film**

Tao Wang<sup>a,b,c</sup>, Menxiang Qian<sup>a,b,c</sup>, Kun Wu<sup>a,b,c</sup>, Guangzhu Ding<sup>a,b,c,\*</sup> and Jieping Liu<sup>a,b,c,\*</sup>

<sup>a</sup>College of Chemistry and Materials Science, Huaibei Normal University, Huaibei 235000,  
China

<sup>b</sup>Anhui Key Laboratory of Energetic Materials, Anhui, 235000, China

<sup>c</sup>Key Laboratory of Green and Precise Synthetic Chemistry and Applications, Ministry of  
Education; School of Chemistry and Materials Science, Huaibei Normal University, Huaibei,  
Anhui 235000, P. R. China

\* Corresponding Author E-mail address: dinggz@chnu.edu.cn; jpliu@chnu.edu.cn

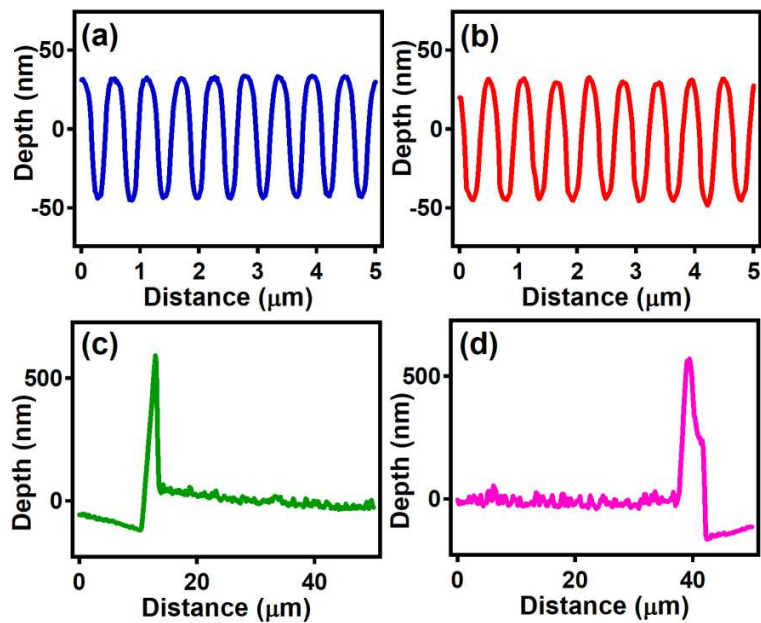

**Fig. S1** The cross-sectional profiles of AFM height images for PDMS template (a), the patterned structure of polymer nanograting film (b), single unpatterned PVPh layer film on substrate (c) and the unpatterned two layers with PVPh and P3HT film on substrate (d).

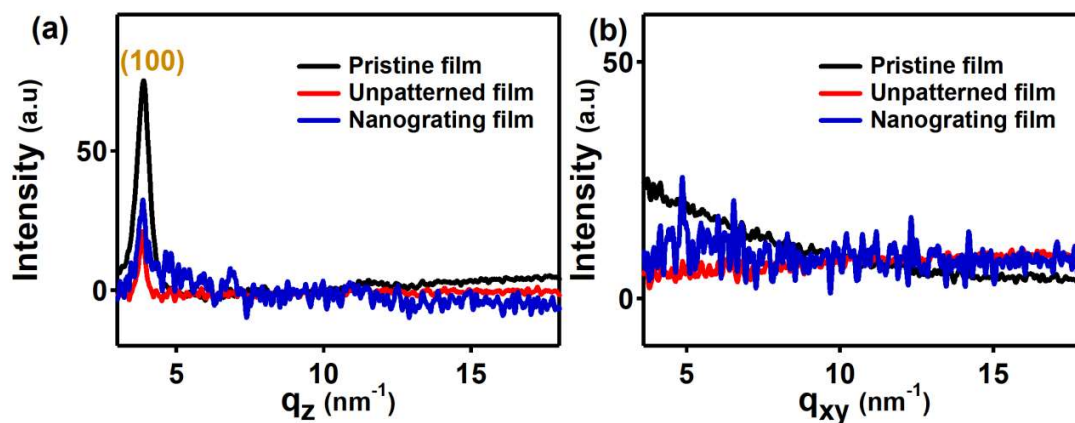

**Fig. S2** The one dimensional (1D) GIWAXD intensity images of pristine film, unpatterned film and nanograting film integrated along the  $q_z$  direction (a) and the  $q_{xy}$  direction (b). The corresponding data are integrated from the 2D images shown in Fig. 4.

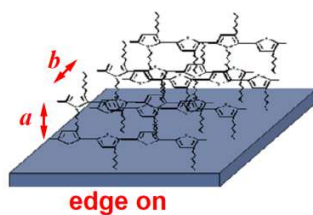

**Fig. S3** The schematic illustration of edge-on molecular orientation.

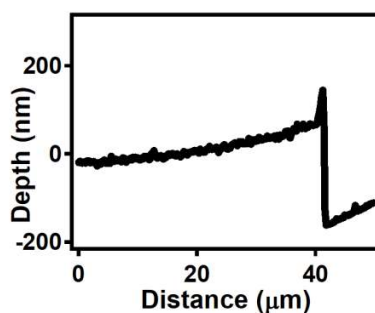

**Fig. S4** The cross-sectional profile of AFM height image for the two layer film with PVPh and P3HT film on substrate.

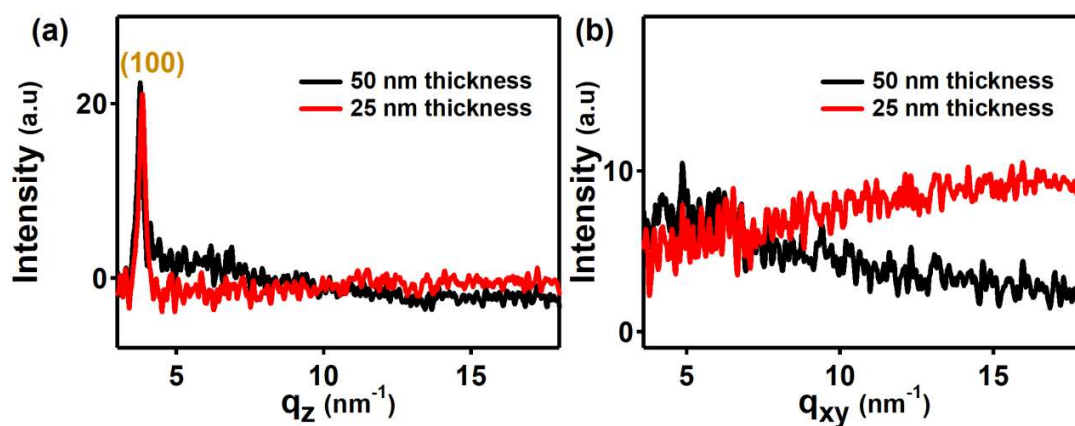

**Fig. S5** 1D GIWAXD intensity images of unpatterned film with different thickness integrated along the  $q_z$  direction (a) and the  $q_{xy}$  direction (b). The corresponding data are integrated from the 2D images shown in Fig. 4 and 5.

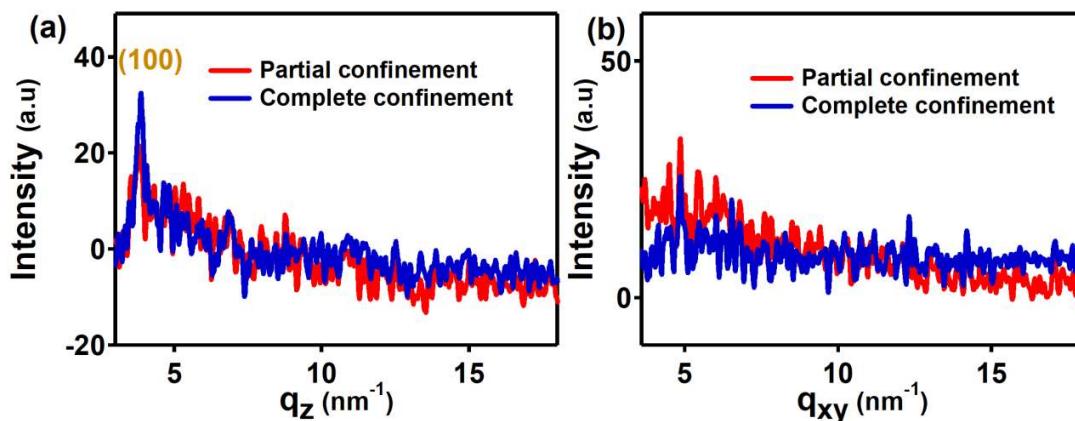

**Fig. S6** 1D GIWAXD intensity images of nanograting film with various confinements integrated along the  $q_z$  direction (a) and the  $q_{xy}$  direction (b). The corresponding data are integrated from the 2D images shown in Fig. 4 and 6.

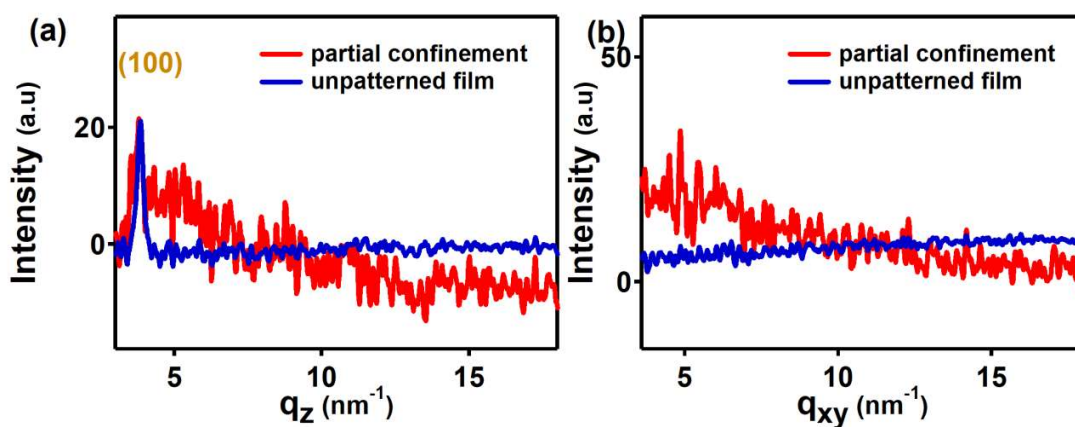

**Fig. S7** 1D GIWAXD intensity images of partial confinement and unpatterned films along the  $q_z$  direction (a) and the  $q_{xy}$  direction (b). The corresponding data of unpatterned film are integrated from the 2D image shown in Fig. 4. The 1D data of partial confinement film are integrated from the 2D image shown in Fig. 6.
